# Supplementary material for: Midlife contributors to socioeconomic differences in frailty during later life: a prospective cohort study
Source: PubMed Central journal article supplement (PMC6120440; doi:10.1016/s2468-2667(18)30079-3), 2018-06-14
Supplement: mmc1.pdf [file mmc1.pdf]

# THE LANCET

## Public Health

### **Supplementary appendix**

This appendix formed part of the original submission and has been peer reviewed. We post it as supplied by the authors.

Supplement to: Brunner EJ, Shipley MJ, Ahmadi-Abhari S, et al. Midlife contributors to socioeconomic differences in frailty during later life: a prospective cohort study. *Lancet Public Health* 2018; published online June 13. [http://dx.doi.org/10.1016/S2468-2667\(18\)30079-3](http://dx.doi.org/10.1016/S2468-2667(18)30079-3).

## APPENDICES

### Midlife contributors to socioeconomic differences in later life frailty: prospective study

Brunner EJ, Shipley MJ, Ahmadi-Abhari S, Valencia Hernandez C, Abell J, Singh-Manoux A, Kawachi I, Kivimaki M

| Item | Appendix/Figure/Table                                                                                                                                                                                                       | Page |
|------|-----------------------------------------------------------------------------------------------------------------------------------------------------------------------------------------------------------------------------|------|
| 1    | Components used in the Fried frailty scale                                                                                                                                                                                  | 2    |
| 2    | Specification of variables used and fitted models                                                                                                                                                                           | 3    |
| 3    | Figure A1: Number and proportion of 6233 participants with 1, 2 and 3 frailty measurements by clinic                                                                                                                        | 6    |
| 4    | Table A1: Age standardised prevalence (% and 95% confidence interval) of the components of frailty by employment grade among 16164 person-observations, by sex                                                              | 7    |
| 5    | Table A2: Age standardised prevalence (%) by employment grade of the components of frailty among 562 person-observations with frailty, by sex                                                                               | 8    |
| 6    | Table A3: Comparison of the prevalence of risk factors in participants in the analytic sample and those excluded, and their associations with employment grade measured at the start of the Whitehall II study (1986-1988). | 9    |
| 7    | Table A4: Effect of adjustment for each potential contributing factor on the association of frailty at 2007-2009, 2012-2013 or 2015-2016 with trend in last known employment grade at age 50, in men and women              | 10   |
| 8    | Table A5: Effect of adjustment for potential contributing factors on the association of frailty at 2007-2009, 2012-2013 or 2012-2013 with trend in last known employment grade at age 50, in men and women                  | 11   |
| 9    | Table A6: Effect of adjustment for each potential contributing factor on the association of ever having frailty at 2007-2009, 2012-2013 or 2015-2016 with last known employment grade at age 50 among 6233 participants     | 12   |
| 10   | Table A7: Effect of adjustment for potential contributing factors on the association of ever having frailty at 2007-2009, 2012-2013 or 2015-2016 with last known employment grade at age 50 among 6233 participants         | 13   |
| 11   | Table A8: Frailty and mortality outcomes and attrition by employment grade among 6233 participants                                                                                                                          | 14   |

## Components used in the Fried frailty scale

1. *Walking speed*: based on the time taken to walk a distance of 8 feet (2.4 m) at usual pace. Established cut-offs for the slow walking speed criterion for frailty have been based on the time taken to walk a distance of 15 feet (4.6 meters). Accordingly, participants were categorized as having slow walking speed when time to walk 8 feet was  $\geq 3.73$  seconds (for men with height  $\leq 173$  cm or women with height  $\leq 159$  cm) or  $\geq 3.20$  seconds (for men with height  $> 173$  cm or women with height  $> 159$  cm).

2. *Grip strength*: measured in kilograms using the Smedley hand grip dynamometer. Cut-offs were stratified by gender and body mass index (BMI). For men, low grip strength was denoted as:  $\leq 29$  kg (BMI  $\leq 24$  kg/m<sup>2</sup>),  $\leq 30$  (BMI 24.1-28), and  $\leq 32$  (BMI  $> 28$ ). For women, low grip strength was:  $\leq 17$  (BMI  $\leq 23$ ),  $\leq 17.3$  (BMI 23.1-26),  $\leq 18$  (BMI 26.1-29), and  $\leq 21$  (BMI  $> 29$ ).

3. *Weight loss*: weight loss in the context of frailty has been defined as unintentional weight loss of  $\geq 5\%$  body weight lost over the previous year. This same measure was not available in the Whitehall II study. For each of the phases 9, 11 and 12, we calculated percentage weight loss since the previous phase (7, 9 and 11 respectively), and used weight loss  $>10\%$  as the weight loss criterion for frailty, in accordance with that in the Women's Health Aging Study-I.

4. *Exhaustion*: defined using two items drawn from the Center for Epidemiology Studies-Depression (CES-D) scale: "I felt that everything I did was an effort in the last week" and "I could not get going in the last week". If participants answered "occasionally or moderate amount of the time (3-4 days)" or "most or all of the time (5-7 days)" to either of these items, they were categorized as exhausted.

5. *Physical activity*: based on a modified version of the Minnesota leisure-time physical activity questionnaire which includes 20 items on the frequency and duration of participation in different physical activities (e.g., running, cycling, other sports, housework, and gardening activities). Total hours per week were calculated for each activity and a metabolic equivalent (MET) value was assigned to each based on a compendium of values. Energy expenditure (kcal/week) was computed for each participant. Low levels of physical activity were denoted by an expenditure of  $<383$  kcal/week in men and  $<270$  kcal/week in women.

A total frailty score was calculated by allocating a value of 1 to each of the above criteria if present, resulting in a range of 0 to 5. Participants were classified as "frail" if they had at least three out of the five frailty components; as "pre-frail" if they had 1 or 2 components; and as "non-frail" if they had none of these components.

## Specification of variables used and fitted models

| Variable     | Description or coding                                                                 |
|--------------|---------------------------------------------------------------------------------------|
| id           | Subject identifier                                                                    |
| frailty2     | Frailty (non-frail or pre-frail = 0, frail = 1)                                       |
| age          | Age(years) at fifth clinic (first frailty measurement) in 2007-2009                   |
| agegroup     | Factor for age group at fifth clinic (first frailty measurement) in 2007-2009         |
| time         | Time(years) since fifth clinic                                                        |
| ethnicity    | Factor with 4 groups (white, south asian, black, other)                               |
| riskfactor   | Risk factor of interest (continuous variable or a factor)                             |
| mstatus      | Marital status at age 50 (not married =0, married/cohabiting = 1)                     |
| ses          | Employment grade at age 50 (continuous variable: high = 1, intermediate = 2, low = 3) |
| sesfactor    | Factor for employment grade at age 50 (high = 1, intermediate = 2, low = 3)           |
| _imputation_ | Variable to identify the 10 imputed datasets                                          |

## Models for Table 1

```
proc glimmix data=<10 datasets with missing values imputed> noclprint order=formatted;
model frailty2 (event='1') = agegroup sex ethnicity time
                        / solution dist=binary link=logit ;
random intercept / subject = id ;
by _imputation_ ;
nloptions tech=newrap ;
ods output ParameterEstimates=outests ;
run;
proc mianalyze parms=outests;
modeleffects agegroup ;
run;
```

```
proc glimmix data=<10 datasets with missing values imputed> noclprint order=formatted;
model frailty2 (event='1') = age age2 sex ethnicity time
                        / solution dist=binary link=logit ;
random intercept / subject = id ;
by _imputation_ ;
nloptions tech=newrap ;
ods output ParameterEstimates=outests ;
run;
proc mianalyze parms=outests;
modeleffects sex ethnicity ;
run;
```

```
proc glimmix data=<10 datasets with missing values imputed> noclprint order=formatted;
model frailty2 (event='1') = age age2 sex ethnicity time mstatus
                        / solution dist=binary link=logit ;
random intercept / subject = id ;
by _imputation_ ;
```

```

nloptions tech=newrap ;
ods output ParameterEstimates=outests ;
run;
proc mianalyze parms=outests;
modeffects mstatus ;
run;

proc glimmix data=<10 datasets with missing values imputed> noclprint order=formatted;
model frailty2 (event='1') = age age2 sex ethnicity time sesfactor
/ solution dist=binary link=logit ;
random intercept / subject = id ;
by _imputation_ ;
nloptions tech=newrap ;
ods output ParameterEstimates=outests ;
run;
proc mianalyze parms=outests;
modeffects sesfactor ;
run;

```

### **Models for Tables 2 and 3**

```

proc glimmix data=<10 datasets with missing values imputed> noclprint order=formatted;
model frailty2 (event='1') = age age2 sex ethnicity time riskfactor
/ solution dist=binary link=logit ;
random intercept / subject = id ;
by _imputation_ ;
nloptions tech=newrap ;
ods output ParameterEstimates=outests ;
run;
proc mianalyze parms=outests;
modeffects riskfactor ;
run;

```

### **Models for Table 4**

#### Base model (M0)

```

proc glimmix data=<10 datasets with missing values imputed> noclprint order=formatted;
model frailty2 (event='1') = age age2 sex ethnicity mstatus mstatus*sex time ses
/ solution dist=binary link=logit ;
random intercept / subject = id ;
by _imputation_ ;
nloptions tech=newrap ;
ods output ParameterEstimates=outests ; run;
proc mianalyze parms=outests; modeffects ses ;
run;

```

Base model + risk factor (M1)

```
proc glimmix data=<10 datasets with missing values imputed> noclprint order=formatted;  
model frailty2 (event='1') = age age2 sex ethnicity mstatus mstatus*sex time riskfactor ses  
    / solution dist=binary link=logit ;  
random intercept / subject = id ;  
by _imputation_ ;  
nloptions tech=newrap ;  
ods output ParameterEstimates=outests ; run;  
proc mianalyze parms=outests; modeleffects ses ;  
run;
```

Percentage change in ses = (ses from M1 – ses from M0)\*100 / (ses from M0)

**Models for Table 5**

Base model (M0) – as for Table 4

Base model + set of risk factors as specified in Table 5 (M2)

```
proc glimmix data=<10 datasets with missing values imputed> noclprint order=formatted;  
model frailty2 (event='1') = age age2 sex ethnicity mstatus mstatus*sex time <set of risk factors> ses  
    / solution dist=binary link=logit ;  
random intercept / subject = id ;  
by _imputation_ ;  
nloptions tech=newrap ;  
ods output ParameterEstimates=outests ; run;  
proc mianalyze parms=outests; modeleffects ses ;  
run;
```

Percentage change in ses = (ses from M2 – ses from M0)\*100 / (ses from M0)

Figure A1: Number and proportion of 6233 participants with 1, 2 and 3 frailty measurements by clinic

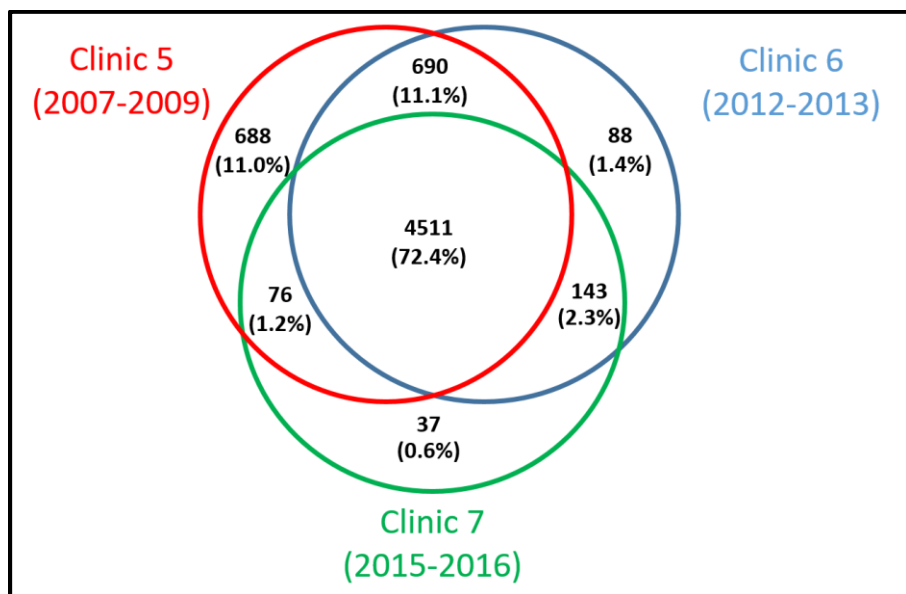

**Table A1:** Age standardised prevalence (% and 95% confidence interval) of the components of frailty by employment grade among 16164 person-observations, by sex

| Components of frailty | Sex   | Employment grade  |                   |                   | p-trend |
|-----------------------|-------|-------------------|-------------------|-------------------|---------|
|                       |       | High              | Intermediate      | Low               |         |
| Physical activity     | Men   | 22.6 (21.6, 23.7) | 29.4 (28.2, 30.7) | 47.1 (42.4, 51.8) | <0.001  |
|                       | Women | 28.5 (25.6, 32.5) | 28.4 (26.5, 30.4) | 39.1 (36.4, 41.8) | <0.001  |
| Walking speed         | Men   | 2.6 (2.2, 3.0)    | 4.9 (4.3, 5.5)    | 12.9 (9.8, 15.9)  | <0.001  |
|                       | Women | 6.2 (4.5, 7.9)    | 8.8 (7.5, 10.0)   | 17.4 (15.4, 19.4) | <0.001  |
| Grip strength         | Men   | 13.3 (12.5, 14.2) | 17.0 (15.9, 18.0) | 28.3 (24.2, 32.3) | <0.001  |
|                       | Women | 13.9 (11.5, 14.2) | 16.9 (15.2, 18.5) | 21.6 (19.4, 23.8) | <0.001  |
| Weight loss           | Men   | 2.7 (2.3, 3.2)    | 2.8 (2.3, 3.3)    | 4.6 (2.6, 6.7)    | 0.19    |
|                       | Women | 4.8 (3.5, 6.2)    | 7.1 (6.0, 8.2)    | 6.8 (5.4, 8.2)    | 0.18    |
| Exhaustion            | Men   | 8.2 (7.5, 8.8)    | 10.3 (9.5, 11.2)  | 14.1 (10.8, 17.4) | <0.001  |
|                       | Women | 10.7 (8.7, 12.8)  | 14.5 (12.9, 16.0) | 16.1 (14.0, 18.2) | <0.001  |



**Table A2:** Age standardised prevalence (%) by employment grade of the components of frailty among 562 person-observations with frailty, by sex

| Components of frailty | Sex   | Employment grade |              |      | p-trend |
|-----------------------|-------|------------------|--------------|------|---------|
|                       |       | High             | Intermediate | Low  |         |
| Physical activity     | Men   | 95.3             | 94.4         | 96.2 | 0.82    |
|                       | Women | 88.5             | 90.0         | 90.2 | 0.76    |
| Walking speed         | Men   | 57.1             | 62.2         | 67.1 | 0.21    |
|                       | Women | 51.7             | 68.3         | 83.6 | <0.001  |
| Grip strength         | Men   | 90.5             | 83.4         | 88.6 | 0.27    |
|                       | Women | 83.6             | 71.4         | 76.6 | 0.82    |
| Weight loss           | Men   | 21.8             | 22.1         | 26.3 | 0.68    |
|                       | Women | 20.5             | 35.5         | 23.2 | 0.24    |
| Exhaustion            | Men   | 65.2             | 58.9         | 51.3 | 0.12    |
|                       | Women | 77.4             | 71.9         | 59.8 | 0.05    |

**Table A3:** Comparison of the prevalence of risk factors in participants in the analytic sample and those excluded, and their associations with employment grade measured at the start of the Whitehall II study (1986-1988).

| Risk factor <sup>a</sup>                                 | In analytic sample | N    | Employment grade <sup>a</sup>               |      |              | p-trend across grades |        |
|----------------------------------------------------------|--------------------|------|---------------------------------------------|------|--------------|-----------------------|--------|
|                                                          |                    |      | Total                                       | High | Intermediate |                       | Low    |
|                                                          |                    |      | Prevalence of risk factor (% <sup>b</sup> ) |      |              |                       |        |
| <b>Current Smoker</b>                                    |                    |      |                                             |      |              |                       |        |
|                                                          | Yes                | 6195 | 13.8                                        | 10.1 | 14.7         | 26.4                  | <0.001 |
|                                                          | No <sup>c</sup>    | 3163 | 22.7                                        | 13.4 | 21.4         | 33.8                  | <0.001 |
| <b>Inactive</b>                                          |                    |      |                                             |      |              |                       |        |
|                                                          | Yes                | 5953 | 12.9                                        | 8.5  | 11.3         | 30.8                  | <0.001 |
|                                                          | No                 | 2932 | 19.2                                        | 9.1  | 13.6         | 37.1                  | <0.001 |
| <b>Overweight or obese (BMI ≥ 25.0 Kgm<sup>-2</sup>)</b> |                    |      |                                             |      |              |                       |        |
|                                                          | Yes                | 6228 | 37.1                                        | 31.6 | 37.3         | 43.4                  | <0.001 |
|                                                          | No                 | 3187 | 41.7                                        | 37.8 | 39.3         | 47.0                  | <0.001 |
| <b>IL6 &gt; 2.0 pg ml<sup>-1</sup></b>                   |                    |      |                                             |      |              |                       |        |
|                                                          | Yes                | 5080 | 39.3                                        | 33.7 | 41.0         | 48.7                  | <0.001 |
|                                                          | No                 | 510  | 51.6                                        | 39.8 | 49.5         | 65.9                  | <0.001 |

<sup>a</sup> Employment grade and the risk factors, smoking status, physical activity and obesity are from the start of the study (1986-1988) and IL6 is from the fourth clinic (2002-2004)

<sup>b</sup> Percentages are adjusted for age and sex

<sup>c</sup> Participants who were still alive at the fifth clinic (2007-2009) when frailty was first assessed but who are not in the analytic sample

**Table A4:** Effect of adjustment for each potential contributing factor on the association of frailty at 2007-2009, 2012-2013 or 2015-2016 with trend in last known employment grade at age 50, in men and women

| Model adjustments                                     | MEN<br>(11691 person-observations) |                       | WOMEN<br>(4473 person-observations) |                       |
|-------------------------------------------------------|------------------------------------|-----------------------|-------------------------------------|-----------------------|
|                                                       | OR <sup>a</sup> (95% CI)           | % Change <sup>b</sup> | OR <sup>a</sup> (95% CI)            | % Change <sup>b</sup> |
| Base model <sup>c</sup>                               | 1.36 (1.08,1.71)                   | Reference             | 1.65 (1.31, 2.09)                   | Reference             |
| Base model + Smoking status                           | 1.33 (1.06,1.68)                   | -5.8                  | 1.63 (1.28, 2.06)                   | -3.2                  |
| Base model + Alcohol consumption                      | 1.34 (1.06,1.69)                   | -4.7                  | 1.54 (1.21, 1.97)                   | -13.4                 |
| Base model + Frequency of fruit/vegetable consumption | 1.34 (1.06,1.68)                   | -5.0                  | 1.64 (1.29, 2.08)                   | -1.4                  |
| Base model + Physical activity                        | 1.27 (1.01,1.60)                   | -22.2                 | 1.58 (1.24, 2.00)                   | -9.2                  |
| Base model + FEV                                      | 1.28 (1.01,1.61)                   | -19.8                 | 1.61 (1.27, 2.05)                   | -4.7                  |
| Base model + BMI category                             | 1.31 (1.04,1.65)                   | -11.9                 | 1.58 (1.25, 2.01)                   | -8.8                  |
| Base model + Depressive symptoms                      | 1.37 (1.08,1.72)                   | +2.0                  | 1.69 (1.34, 2.15)                   | +5.0                  |
| Base model + Hypertension                             | 1.38 (1.10,1.74)                   | -1.1                  | 1.66 (1.31, 2.10)                   | +1.0                  |
| Base model + Diabetes                                 | 1.34 (1.06,1.68)                   | -4.3                  | 1.65 (1.31, 2.09)                   | -0.1                  |
| Base model + CVD                                      | 1.35 (1.07,1.70)                   | -1.8                  | 1.65 (1.30, 2.09)                   | -0.3                  |
| Base model + Total cholesterol                        | 1.36 (1.08,1.71)                   | +0.7                  | 1.65 (1.31, 2.09)                   | +0.1                  |
| Base model + HDL cholesterol                          | 1.33 (1.06,1.68)                   | -6.5                  | 1.61 (1.27, 2.04)                   | -5.6                  |
| Base model + Total cholesterol:HDL ratio              | 1.34 (1.07,1.69)                   | -3.9                  | 1.62 (1.28, 2.05)                   | -4.2                  |
| Base model + Fasting glucose <sup>d</sup>             | 1.38 (1.09,1.75)                   | +1.1                  | 1.67 (1.32, 2.12)                   | +1.6                  |
| Base model + IL6                                      | 1.29 (1.02,1.63)                   | -16.4                 | 1.58 (1.24, 2.01)                   | -8.8                  |
| Base model + CRP                                      | 1.31 (1.04,1.65)                   | -12.0                 | 1.58 (1.25, 2.01)                   | -8.7                  |

<sup>a</sup> Odds ratios of frailty from trend with last known grade on 1 degree of freedom (i.e. the odds ratio of frailty for one unit lower grade level, across low, intermediate and high employment grades).

<sup>b</sup> Percentage change in coefficient (log odds ratio) for trend across employment grade, compared to base model.

<sup>c</sup> Base model is adjusted for age and age squared at fifth clinic, time of frailty measure since fifth clinic, sex, ethnicity, marital status, marital status by sex interaction.

<sup>d</sup> Fasting glucose in non-diabetics only

**Table A5:** Effect of adjustment for potential contributing factors on the association of frailty at 2007-2009, 2012-2013 or 2012-2013 with trend in last known employment grade at age 50, in men and women

| Model                                                                                | Model adjustments                                                                                                                                                                            | MEN<br>(11691 person-observations) |                          | WOMEN<br>(4473 person-observations) |                          |
|--------------------------------------------------------------------------------------|----------------------------------------------------------------------------------------------------------------------------------------------------------------------------------------------|------------------------------------|--------------------------|-------------------------------------|--------------------------|
|                                                                                      |                                                                                                                                                                                              | OR <sup>a</sup> (95% CI)           | %<br>Change <sup>b</sup> | OR <sup>a</sup> (95% CI)            | %<br>Change <sup>b</sup> |
| Base model (BM)                                                                      | Age at fifth clinic, age squared, sex, ethnicity, marital status, marital status by sex interaction, time of frailty measure since fifth clinic                                              | 1.36 (1.08, 1.71)                  | Reference                | 1.65 (1.31, 2.09)                   | Reference                |
| Health behaviours                                                                    | BM + smoking, alcohol, physical activity, fruit/vegetable consumption                                                                                                                        | 1.24 (0.97, 1.57)                  | -30.8                    | 1.47 (1.15, 1.89)                   | -23.3                    |
| Health behaviours + BMI                                                              | BM + smoking, alcohol, physical activity, fruit/vegetable consumption, BMI                                                                                                                   | 1.21 (0.95, 1.53)                  | -38.4                    | 1.43 (1.11, 1.84)                   | -28.8                    |
| Disease status                                                                       | BM + prevalent CVD, diabetes and depressive symptoms                                                                                                                                         | 1.34 (1.06, 1.69)                  | -4.1                     | 1.69 (1.33, 2.14)                   | +4.6                     |
| Predictors of impaired functioning:<br>I: Of both cognitive and physical functioning | BM + hypertension, physical activity, FEV                                                                                                                                                    | 1.21 (0.95, 1.53)                  | -38.5                    | 1.55 (1.22, 1.97)                   | -12.9                    |
| II: As for I + physical function predictors                                          | BM + hypertension, physical activity, FEV, inflammatory markers (CRP, IL6)                                                                                                                   | 1.16 (0.92, 1.47)                  | -50.5                    | 1.47 (1.15, 1.88)                   | -22.7                    |
| All covariates (AC)                                                                  | BM + smoking, alcohol, physical activity, fruit/vegetable consumption, BMI, hypertension, physical activity, FEV, inflammatory markers, HDL, prevalent CVD, diabetes and depressive symptoms | 1.13 (0.89, 1.45)                  | -58.6                    | 1.44 (1.11, 1.87)                   | -27.3                    |
| <b>SENSITIVITY ANALYSIS</b>                                                          |                                                                                                                                                                                              |                                    |                          |                                     |                          |
| AC, excluding physical activity                                                      | As above, excluding physical activity                                                                                                                                                        | 1.17 (0.92, 1.50)                  | -47.7                    | 1.48 (1.14, 1.92)                   | -21.9                    |
| AC, excluding BMI                                                                    | As above, excluding BMI                                                                                                                                                                      | 1.14 (0.90, 1.46)                  | -55.7                    | 1.43 (1.11, 1.86)                   | -28.4                    |
| AC, excluding physical activity and BMI                                              | As above, excluding physical activity and BMI                                                                                                                                                | 1.19 (0.93, 1.51)                  | -43.9                    | 1.47 (1.14, 1.91)                   | -22.7                    |

<sup>a</sup> Odds ratios of frailty from trend with last known grade on 1 degree of freedom (i.e. the odds ratio of frailty for one unit lower grade level, across low, intermediate and high employment grades), in 4456 men and 1777 women.

<sup>b</sup> Percentage change in coefficient (log odds ratio) for trend across employment grade, compared to base model.

<sup>c</sup> Base model is adjusted for age and age squared at fifth clinic, time of frailty measure since fifth clinic, sex, ethnicity, marital status, marital status by sex interaction.

**Table A6:** Effect of adjustment for each potential contributing factor on the association of ever having frailty at 2007-2009, 2012-2013 or 2015-2016 with last known employment grade at age 50 among 6233 participants<sup>a</sup>

| Model adjustments                                     | OR <sup>b</sup> (95% CI) | % Change <sup>c</sup> (95% CI) |
|-------------------------------------------------------|--------------------------|--------------------------------|
| Base model <sup>d</sup>                               | 1.47 (1.25, 1.73)        | Reference                      |
| Base model + Smoking status                           | 1.44 (1.22, 1.69)        | -6.1 (-15.4, -1.1)             |
| Base model + Alcohol consumption                      | 1.44 (1.22, 1.70)        | -5.4 (-16.7, 3.0)              |
| Base model + Frequency of fruit/vegetable consumption | 1.45 (1.23, 1.71)        | -3.9 (-11.2, 1.1)              |
| Base model + Physical activity                        | 1.40 (1.19, 1.65)        | -12.6 (-25.7, -6.1)            |
| Base model + FEV                                      | 1.42 (1.21, 1.67)        | -9.6 (-19.3, -4.5)             |
| Base model + BMI category                             | 1.42 (1.21, 1.67)        | -9.5 (-20.3, -3.9)             |
| Base model + Depressive symptoms                      | 1.50 (1.27, 1.76)        | +4.0 (1.0, 10.3)               |
| Base model + Hypertension                             | 1.48 (1.26, 1.73)        | +0.5 (-1.0, 3.4)               |
| Base model + Diabetes                                 | 1.47 (1.25, 1.73)        | -0.7 (-3.9, 0.2)               |
| Base model + CVD                                      | 1.47 (1.25, 1.72)        | -1.2 (-4.8, 0.1)               |
| Base model + Total cholesterol                        | 1.47 (1.25, 1.73)        | 0.0 (-1.0, 1.0)                |
| Base model + HDL cholesterol                          | 1.45 (1.23, 1.70)        | -4.6 (-11.8, -1.2)             |
| Base model + Total cholesterol:HDL ratio              | 1.45 (1.23, 1.70)        | -4.0 (-9.8, -1.1)              |
| Base model + Fasting glucose <sup>e</sup>             | 1.48 (1.25, 1.74)        | +1.0 (-0.9, 4.3)               |
| Base model + IL6                                      | 1.42 (1.20, 1.67)        | -9.9 (-21.1, -4.7)             |
| Base model + CRP                                      | 1.43 (1.21, 1.68)        | -8.1 (-17.7, -3.5)             |

<sup>a</sup> Among the 6233 participants, 449 were classified as being frail on one or more occasions.

<sup>b</sup> Odds ratios of ever being frail at 2007-2009, 2012-2013 or 2015-2016 from trend with last known grade (ie the odds ratio of ever being frail associated with a change in one level of grade category (from high to intermediate or intermediate to low grade).

<sup>c</sup> Percentage change in coefficient (log odds ratio) for trend across employment grade, compared to base model

<sup>d</sup> Base model is adjusted for age at fifth clinic, sex, ethnicity, marital status, marital status by sex interaction

<sup>e</sup> Fasting glucose in non-diabetics only

**Table S7:** Effect of adjustment for potential contributing factors on the association of ever having frailty at 2007-2009, 2012-2013 or 2015-2016 with last known employment grade at age 50 among 6233 participants<sup>a</sup>

| Model                                         | Model adjustments                                                                                                                                                                            | OR <sup>b</sup> (95% CI) | % Change <sup>c</sup> (95% CI) |
|-----------------------------------------------|----------------------------------------------------------------------------------------------------------------------------------------------------------------------------------------------|--------------------------|--------------------------------|
| Base model (BM)                               | Age at fifth clinic, sex, ethnicity, marital status, marital status by sex interaction                                                                                                       | 1.47 (1.25, 1.73)        | Reference                      |
| Health behaviours                             | BM + smoking, alcohol, physical activity, fruit/vegetable consumption                                                                                                                        | 1.35 (1.14, 1.59)        | -22.8 (-47.5, -9.5)            |
| Health behaviours + BMI                       | BM + smoking, alcohol, physical activity, fruit/vegetable consumption, BMI                                                                                                                   | 1.31 (1.11, 1.56)        | -29.5 (-59.3, -14.4)           |
| Disease status                                | BM + prevalent CVD, diabetes and depressive symptoms                                                                                                                                         | 1.48 (1.26, 1.75)        | +2.1 (-2.4, 7.7)               |
| Predictors of impaired functioning:           |                                                                                                                                                                                              |                          |                                |
| I: Of both cognitive and physical functioning | BM + hypertension, physical activity, FEV                                                                                                                                                    | 1.36 (1.15, 1.60)        | -20.7 (-40.0, -11.2)           |
| II: As for I + physical function predictors   | BM + hypertension, physical activity, FEV, inflammatory markers (CRP, IL6)                                                                                                                   | 1.31 (1.11, 1.55)        | -30.1 (-56.7, -18.0)           |
| All covariates (AC)                           | BM + smoking, alcohol, physical activity, fruit/vegetable consumption, BMI, hypertension, physical activity, FEV, inflammatory markers, HDL, prevalent CVD, diabetes and depressive symptoms | 1.28 (1.08, 1.52)        | -35.8 (-70.6, -17.5)           |
| SENSITIVITY ANALYSIS                          |                                                                                                                                                                                              |                          |                                |
| AC, excluding physical activity               | As above, excluding physical activity                                                                                                                                                        | 1.31 (1.11, 1.56)        | -29.5 (-60.5, -13.5)           |
| AC, excluding BMI                             | As above, excluding BMI                                                                                                                                                                      | 1.29 (1.09, 1.54)        | -33.7 (-66.7, -16.8)           |
| AC, excluding physical activity and BMI       | As above, excluding physical activity and BMI                                                                                                                                                | 1.33 (1.12, 1.58)        | -26.9 (-56.1, -11.3)           |

<sup>a</sup> Among the 6233 participants, 449 were classified as being frail on one or more occasions.

<sup>b</sup> Odds ratios of frailty from trend with last known grade (i.e. the odds ratio of frailty for one category lower employment grade (from high to intermediate or intermediate to low employment grade), in 6233 participants.

<sup>c</sup> Percentage change in coefficient (log odds ratio) for trend across employment grade, compared to base model

**Table A8:** Frailty and mortality outcomes and attrition by employment grade among 6233 participants

| Outcome      | Explanation                                                            | Total<br>(N=6233) | Employment grade |                          |                |
|--------------|------------------------------------------------------------------------|-------------------|------------------|--------------------------|----------------|
|              |                                                                        |                   | High<br>(N=2677) | Intermediate<br>(N=2764) | Low<br>(N=792) |
| Frail        | Classified as being frail on at least one occasion at Clinic 4, 5 or 6 | 449               | 116<br>(4.3%)    | 200<br>(7.2%)            | 133<br>(16.8%) |
| Dead         | Not frail but died before assessment at clinic 6                       | 282               | 111<br>(4.2%)    | 134<br>(4.9%)            | 37<br>(4.8%)   |
| Attrition    | Not frail but lost to follow-up before assessment at clinic 6          | 1035              | 329<br>(12.3%)   | 484<br>(17.5%)           | 222<br>(28.0%) |
| Followed -up | Not frail at (or before) clinic 6                                      | 4467              | 2121<br>(79.3%)  | 1946<br>(70.4%)          | 400<br>(50.5%) |
